# Supplementary material
Source: publisher site journal article supplement (https://www.dovepress.com/article/407917)
Supplement: Supplementary file 1 [file get_supplementary_file.php]

**Supplementary Table S1** Characteristics of included studies

FNIH: Foundation for the national institutes of health, BMI: Body Mass Index, HGS: handgrip strength, ASM: appendicular skeletal mass, EWGSOP2: revised European Working Group on Sarcopenia in Older people, ALM: Appendicular Lean Mass, GS: Gait Speed, SMI: skeletal mass index, NA: Not Available, EWGSOP: European Working Group on Sarcopenia in Older people, SARC-F: Strength, Assistance in walking, Rise from a chair, Climb stairs, and Falls questionnaire, SA ASMI: South African appendicular skeletal mass index, ASMI: appendicular skeletal mass index, BIA ASMI: Bioelectrical Impedance Analysis appendicular skeletal mass

| Study (Author and year) | Setting area | Study design | Target population age | Diagnostic criteria | | Cut-off values | | sample sizes | | | | | Prevalence | prevalence male | prevalence female |
| --- | --- | --- | --- | --- | --- | --- | --- | --- | --- | --- | --- | --- | --- | --- | --- |
| Male | Female | All | | Male | | Female |
| Dlamini 202216 | Community,  Soweto,  Johannesburg,  South Africa | cross-sectional | 40-60 | FNIH | | BMI unadjusted: HGS 26kg ASM 19.75  BMI adjusted: HGS 1.0 ASM 0.789 | BMI unadjusted: HGS 16kg ASM 15.02  BMI adjusted: HGS 0.56 ASM 0.512 | 934 | 469 | | 465 | | 1.5 | 1.8 | 1.2 |
| Gregson 202217 | Community,  Agincourt, Bushbuckridge,  South Africa | cross sectional | 20-80 | EWGSOP2 | | HGS 27kg  ALM/Heigth2 7.0kg/m2  GS 0.8m/s | HGS 16kg  ALM/Heigth2 5.5kg/m2  GS 0.8m/s | 805 | 258 | | 547 | | 6.708074534 | 11.6 | 4.4 |
| Irwin 202118 | Wits  Donald  Gordon Medical center, South Africa | retrospective cohort | 18-34 | Muscle mass | | SMI 50cm2/m2 | SMI 39cm2/m2 | 106 | 64 | | 42 | | 65 | 71.875 | 54.7619 |
| Pina 202119 | Community,  Cape Town,  South Africa | cross-sectional | 60-85 | FNIH | | BMI adjusted: HGS 1.0 ASM 0.789 | BMI adjusted: HGS 0.56 ASM 0.512 | 138 | 25 | | 113 | | 30.4 | NA | NA |
| Mendham 202120 | Cape Town,  South Africa | cross-sectional | 60-85 | FNIH | |  | BMI adjusted: HGS 0.56  ASM 0.512 | 122 | NA | | 122 | | 27.9 | NA | 27.9 |
| Essomba 202021 | Yaoundé Central Hospital,  Cameroon | cross-sectional | >55 | EWGSOP | | SARC-F 4  HGS 30kg | SARC-F 4  HGS 20kg | 104 | 49 | | 55 | | 26.2 | 14.28571429 | 36.36364 |
| Laubscher 202022 | Tygerberg hospital,  Cape Town,  South Africa | cross-sectional | Mean  74±10 | EWGSOP2 | | ASM 20kg  HGS 27kg | ASM 15kg  HGS 16kg | 65 | 26 | | 39 | | 52 | 38.46153846 | 61.53846 |
| Salinas-Rodriguez 202023 | Community,  Ghana | cross-sectional | >50 | EWGSOP | | SMI < lowest quintile  HGS < lowest quintile  GS < lowest quintile | SMI < lowest quintile  HGS < lowest quintile  GS < lowest quintile | 4302 | 2254 | | 2048 | | 14.1 | NA | NA |
|  | Community,  South Africa |  |  | EWSGOP | | SMI < lowest quintile  HGS < lowest quintile  GS < lowest quintile | SMI < lowest quintile  HGS < lowest quintile  GS < lowest quintile | 3681 | 1616 | | 2065 | | 16.2 | NA | NA |
| Kruger 20158 | Community,  Tlokwe municipality, North-west province,  South Africa | cross-sectional | 45-84 | SA ASMI | |  | SA ASMI: 4.94 kg/m2 | 221 | NA | | 221 | | 9.1 | NA | 9.1 |
|  |  |  |  | EWSGOP |  |  | HGS: 16kg  ASMI 5.5 kg/m2 | 221 | NA | | 221 | | 16.7 | NA | 16.7 |
|  |  |  |  | FNIH | |  | HGS: 16kg  BMI adjusted: ASM < 0.512 | 221 | NA | | 221 | | 38.7 | NA | 38.7 |
| Kruger 201624 | Community,  Tlokwe municipality, North-west province,  South Africa | cross-sectional | >45 | EWGSOP | |  | HGS: 16kg  SMI < 5.45kg/m2 | 247 | NA | | 247 | | 12.6 | NA | 12.6 |
|  |  |  |  | SA ASMI | |  | 4.94kg/m2 | 247 | NA | | 247 | | 8.9 | NA | 8.9 |
| Ngeuleu 201725 | El  Ayachi Hospital,  Morocco | cross-sectional | >18 | Muscle mass | | SMI 7.26 kg/m2 | SMI 5.5 kg/m2 | 123 | 16 | | 107 | | 39.8 | 56.25 | 45.79439 |
| Adebusoye 201826 | University College Hospital, Ibadan,  Oyo State,  Nigeria | cross-sectional | >60 | EWGSOP | | BIA ASM mean - 2SD  GS 0.8m/s | BIA ASM mean - 2SD  GS 0.8m/s | 624 | 246 | | 378 | | 5.4 | 2.845528455 | 7.142857 |
| Zengin 201827 | Community,  Kiang region,  Gambia | prospective cohort | 40-75+ | FNIH | | ALM 19.75kg | ALM 15.02kg | 488 | 239 | | 249 | | 32.78688525 | 20.08368201 | 44.97992 |
|  |  |  |  | EWSGOP | | HGS 30kg  ALM/Heigth2 7.25kg/m2 | HGS 20kg ALM/Heigth2 5.45kg/m2 | 488 | 239 | | 249 | | 14.54918033 | 18.82845188 | 10.44177 |
| Barnard 201628 | Community,  Tlokwe municipality, North-west province,  South Africa | cross-sectional |  | FNIH | |  | ASM 15.02kg | 246 | NA | | 246 | | 38.61788618 | NA | 38.61789 |
| Essomba 202229 | Yaounde Central Hospital,  Cameroon | cross-sectional | >55 | HGS | | 30kg | 20kg | 88 | 42 | | 46 | | 53.4 | 52.38095238 | 54.34783 |
| El Maghraoui 201630 | Military Hospital Mohammed V,  Rabat, Morocco | case-control | Mean 40.7±11.0 | EWGSOP | | HGS 30kg  SMI 7.25kg/m2  Timed get-up-and-go test: 10s |  | 134 | 134 | | NA | | 34.3 | 34.3 | NA |
| Badran 202031 | National Liver Institute hospitals, Menoufia University,  Egypt | prospective cohort | Mean 59.61 ±8.09 | Muscle mass | | SMI 50cm2/m2 | SMI 39cm2/m2 | 262 | 182 | | 80 | | 43.1 | 47.25274725 | 33.75 |
